# Supplementary material for: The gene knockout of angiotensin II type 1a receptor improves high-fat diet-induced obesity in rat via promoting adipose lipolysis
Source: PubMed Central journal article supplement (PMC9269876; doi:10.1371/journal.pone.0267331), 2022-07-08

Raw images in Fig 3.

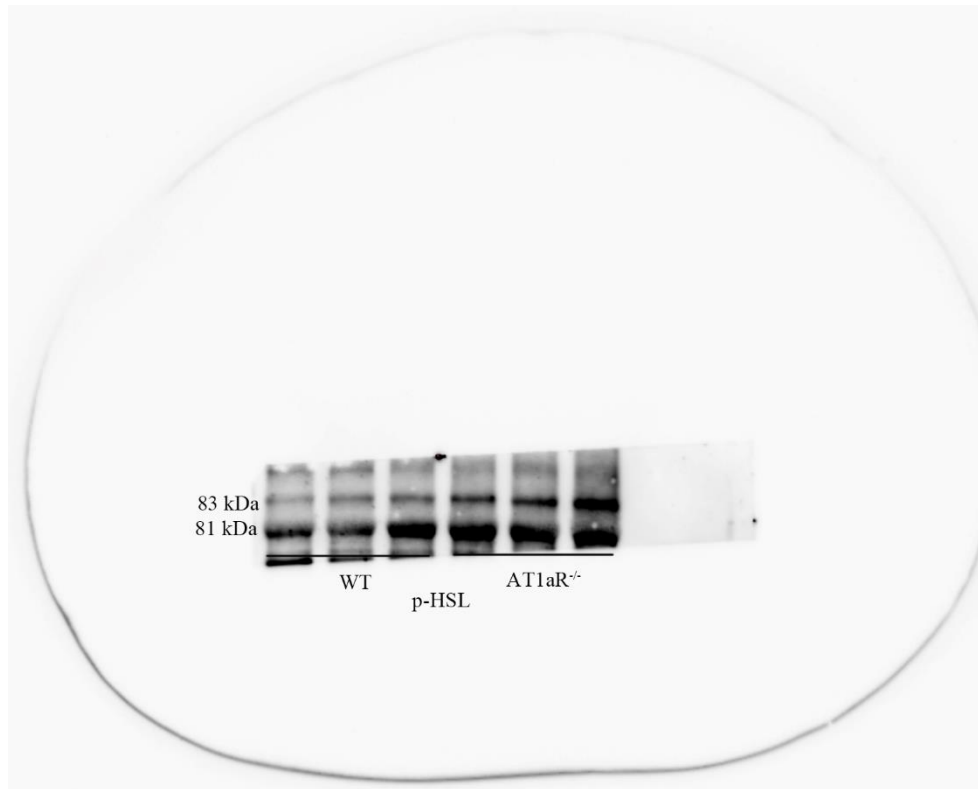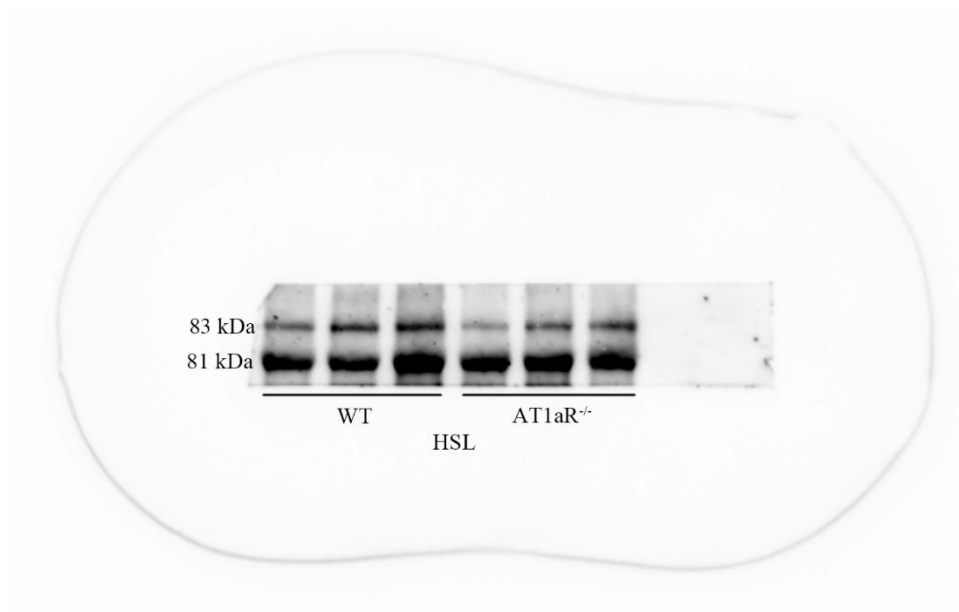

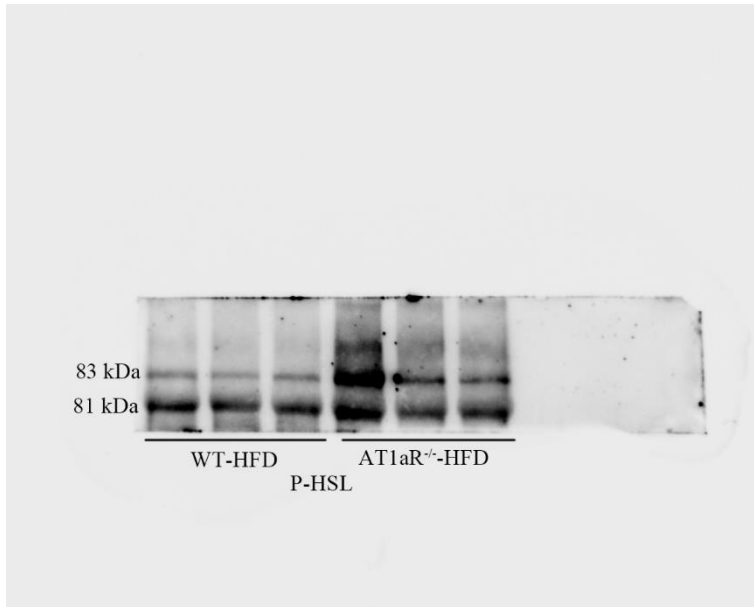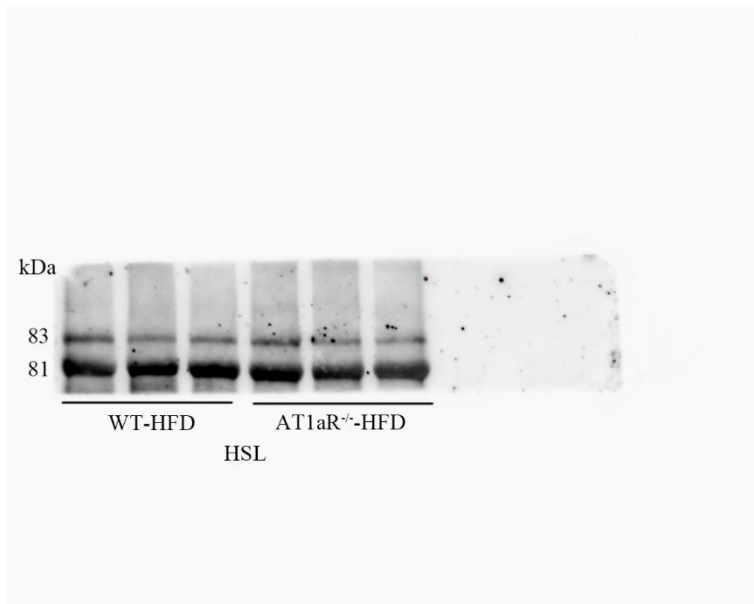

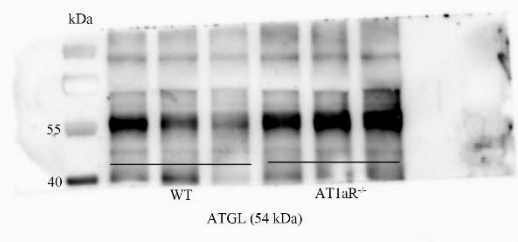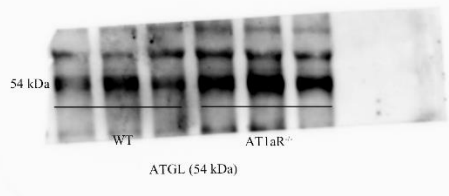

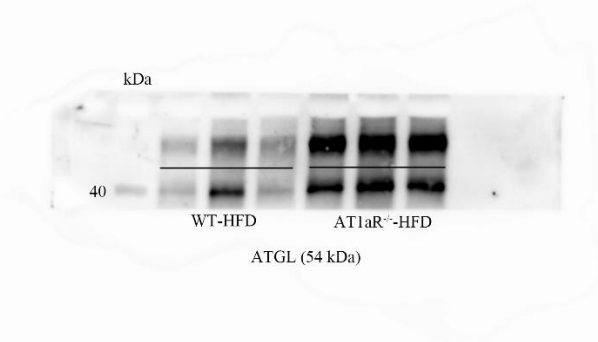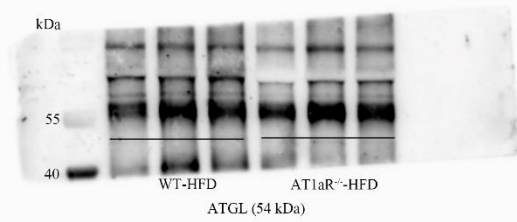

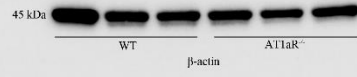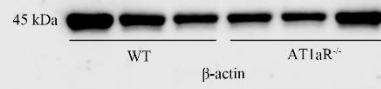

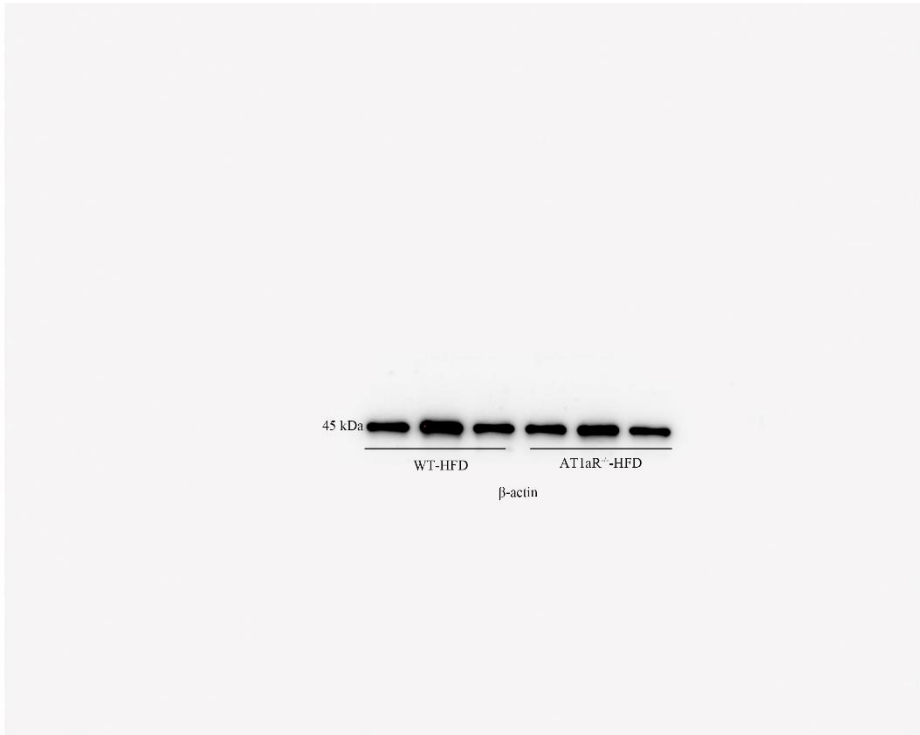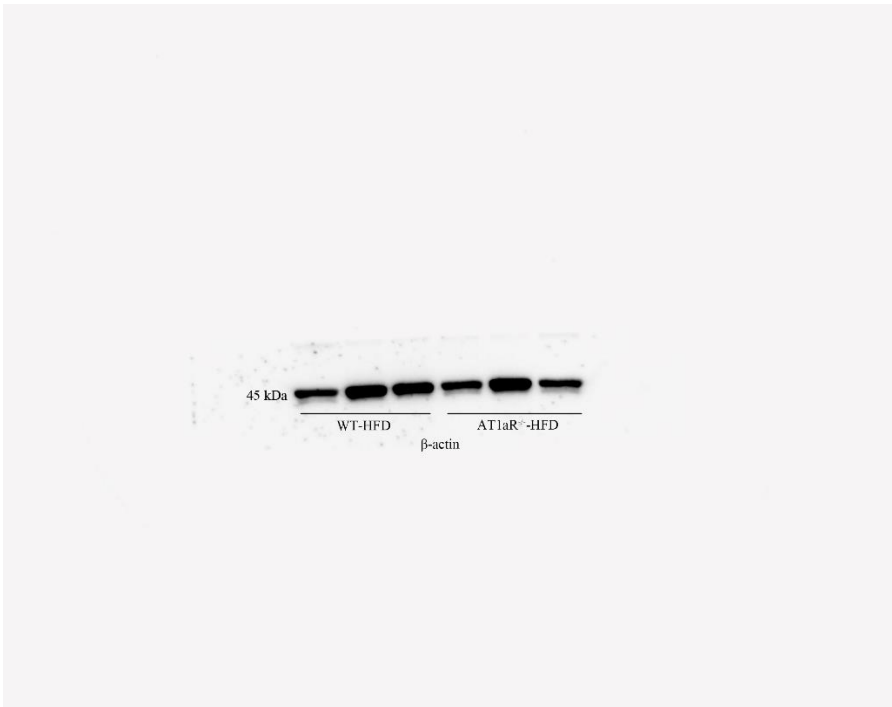

Raw images in Fig 5.

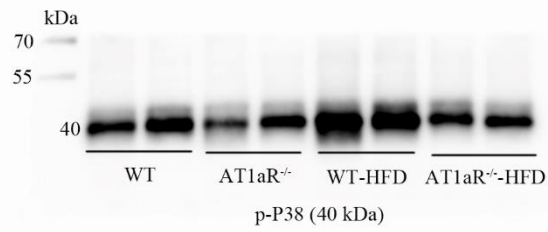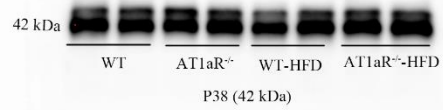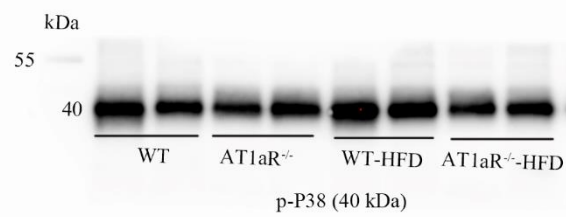

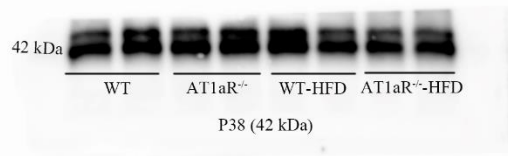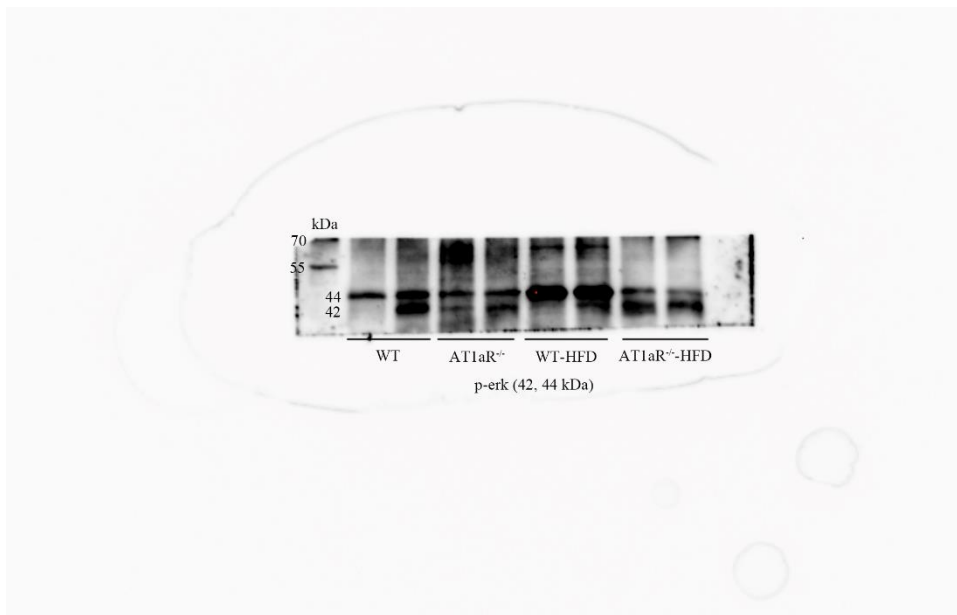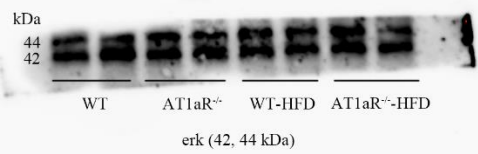



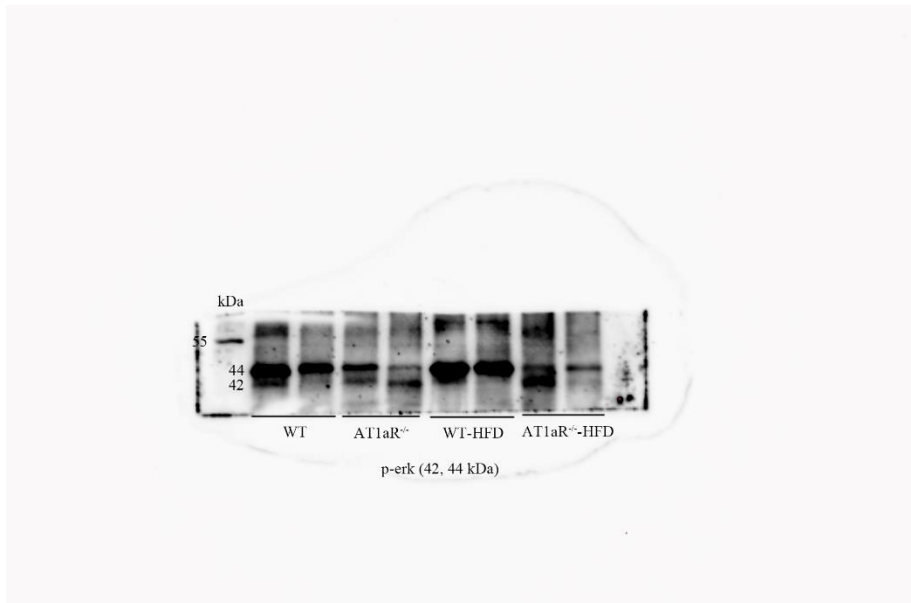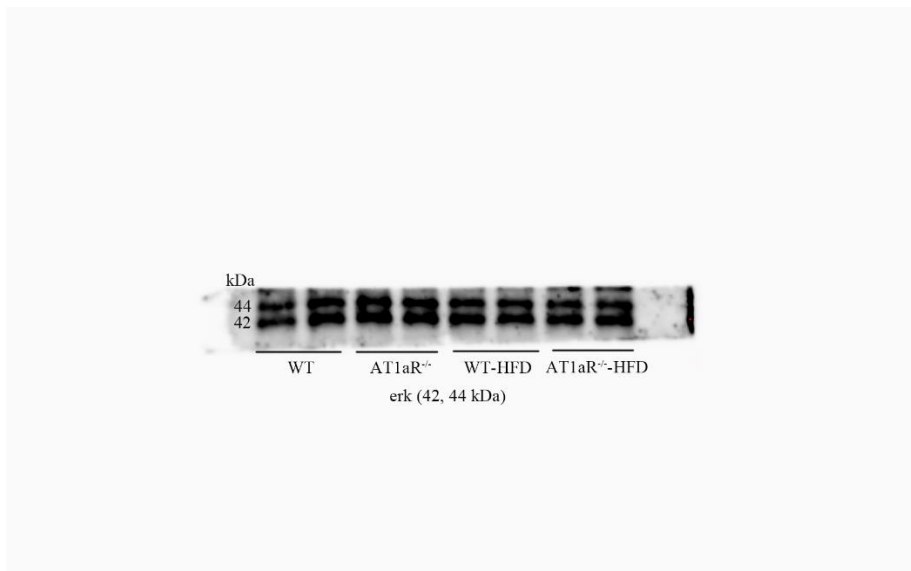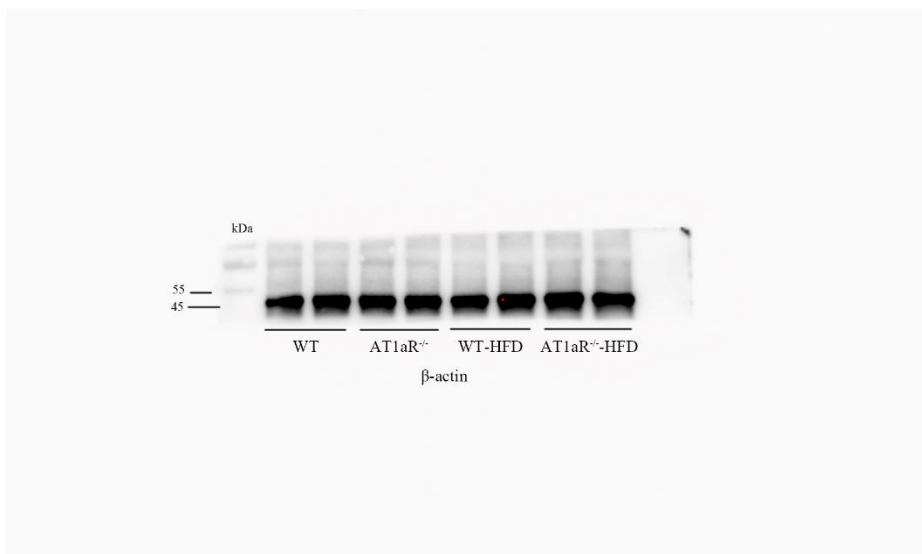

Raw images in Fig 6

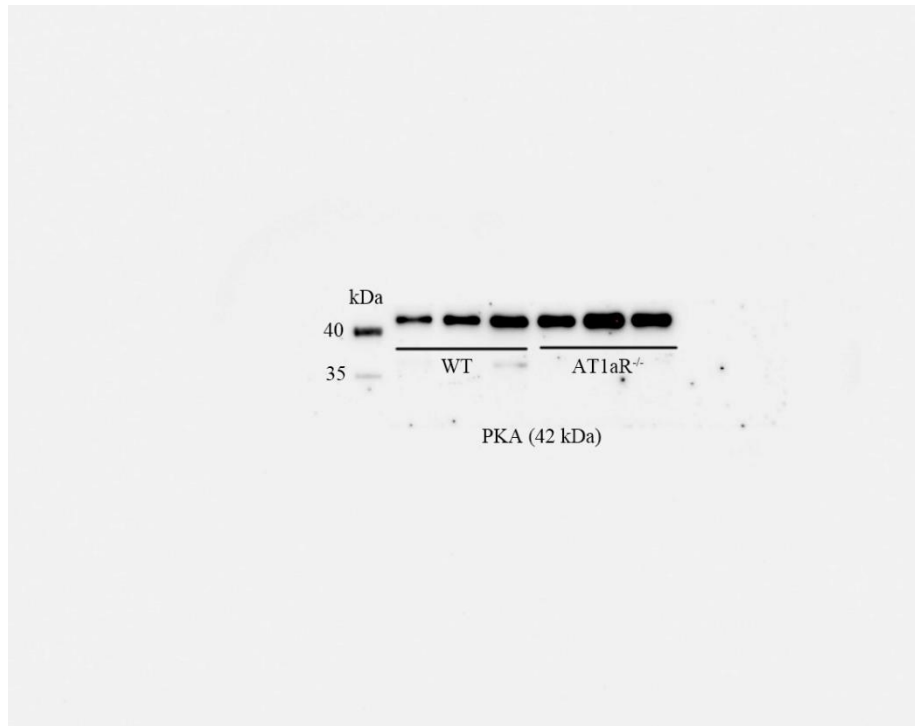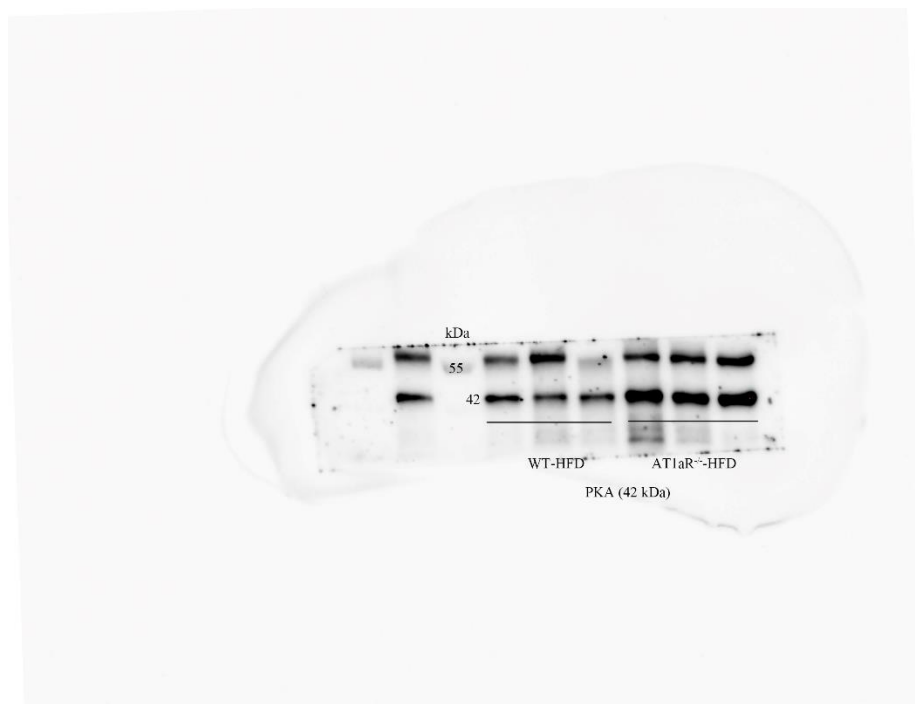

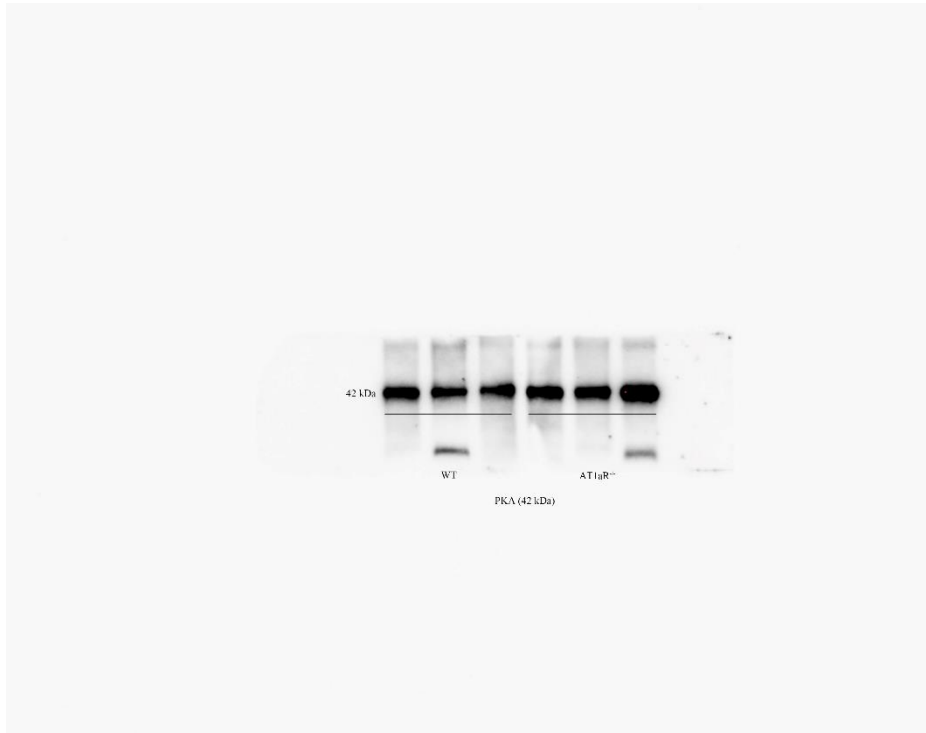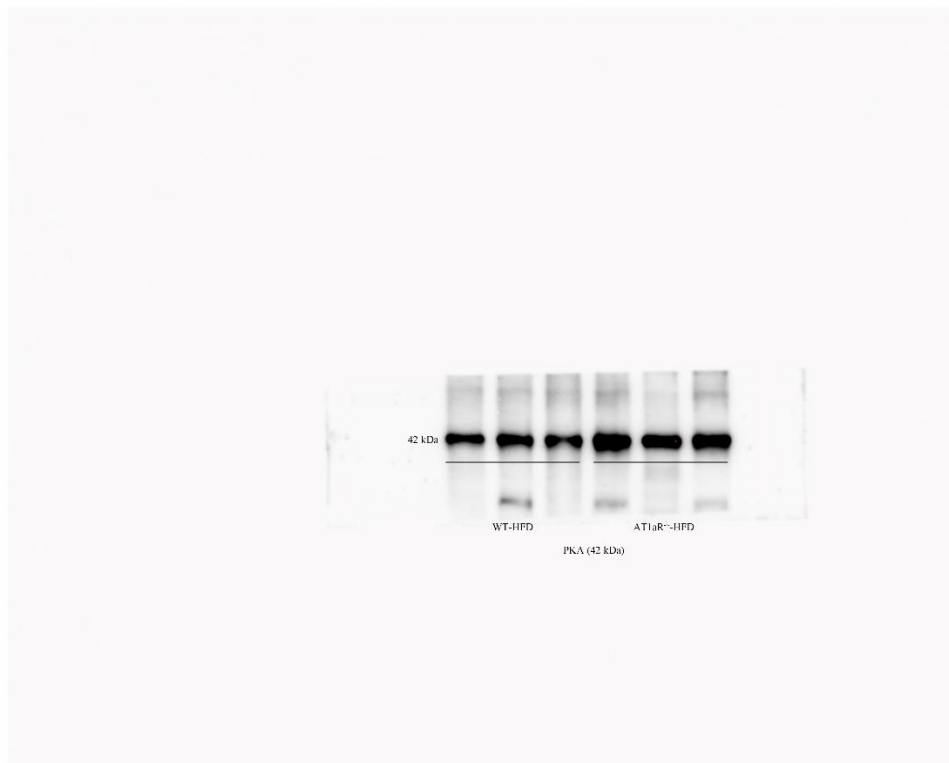

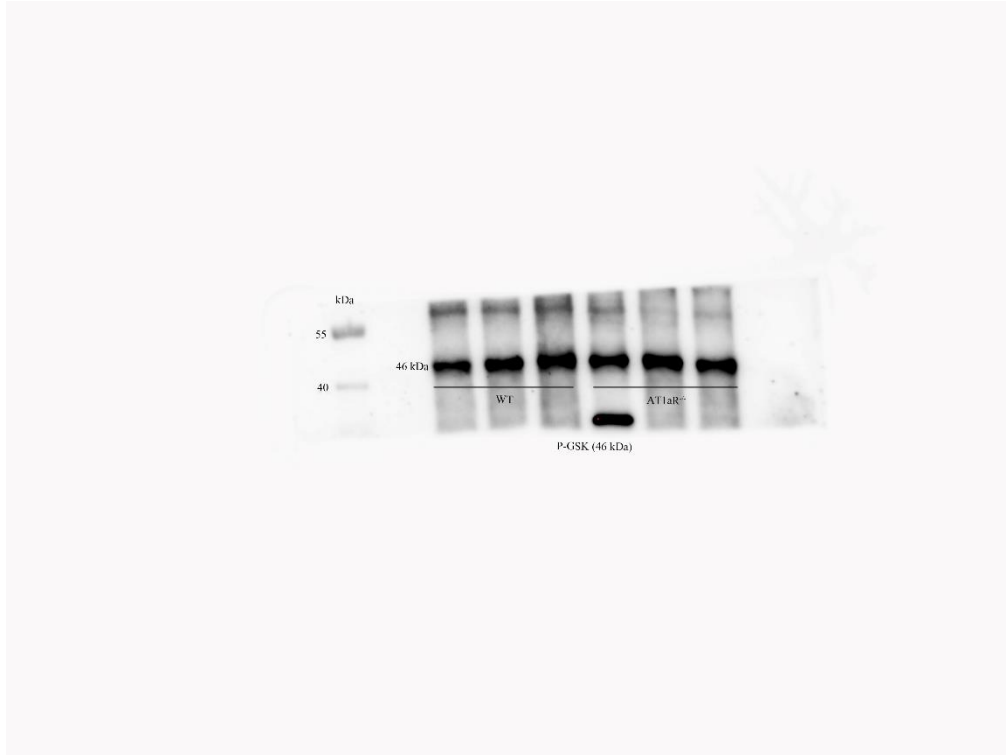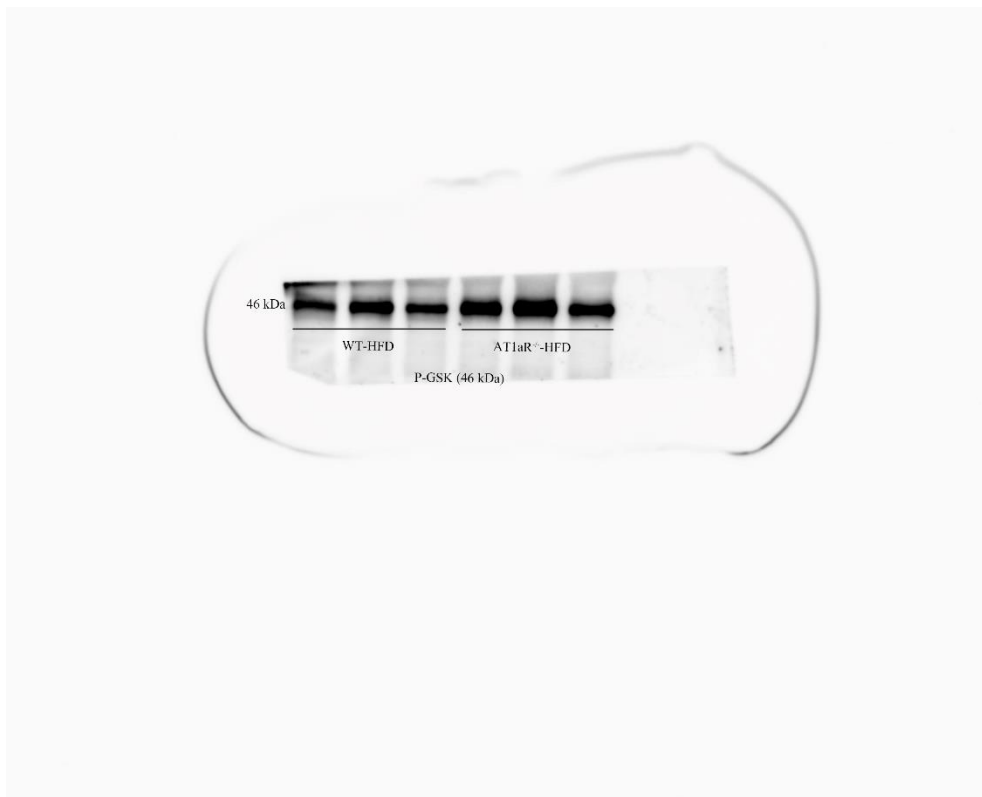

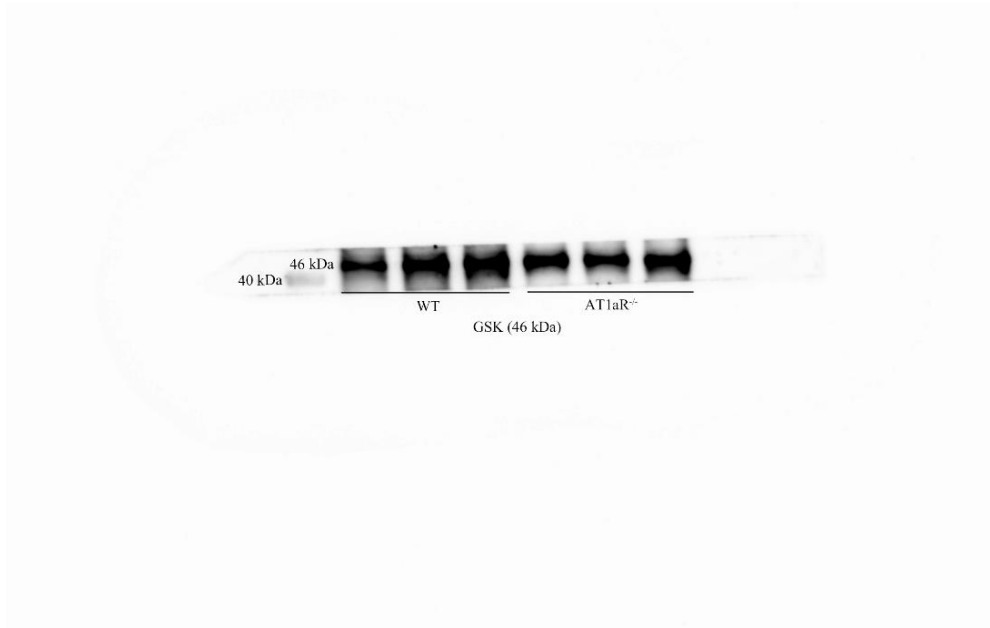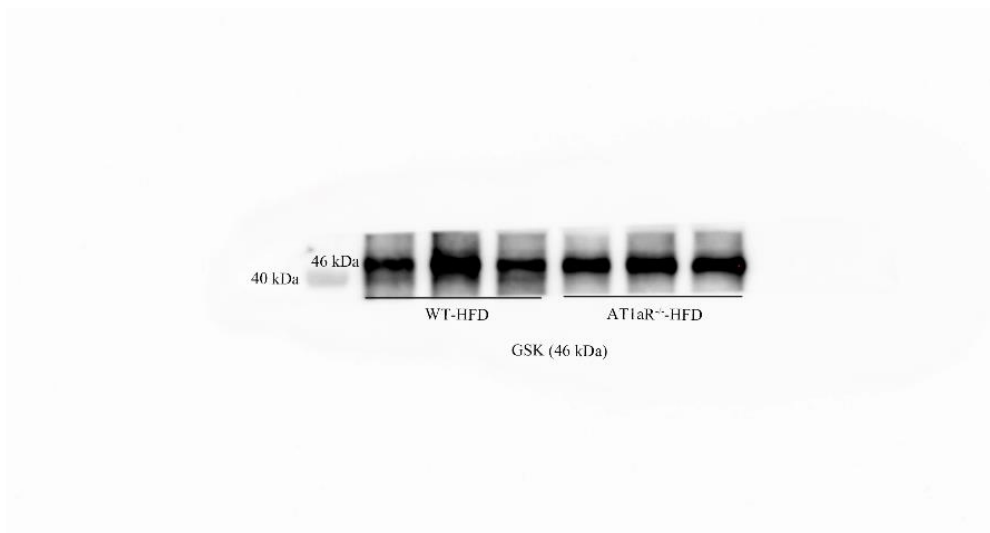

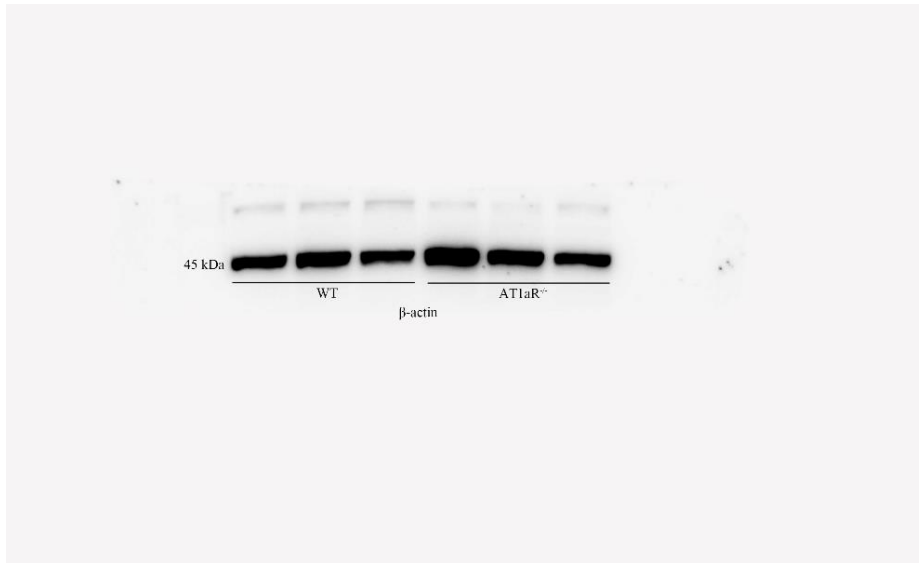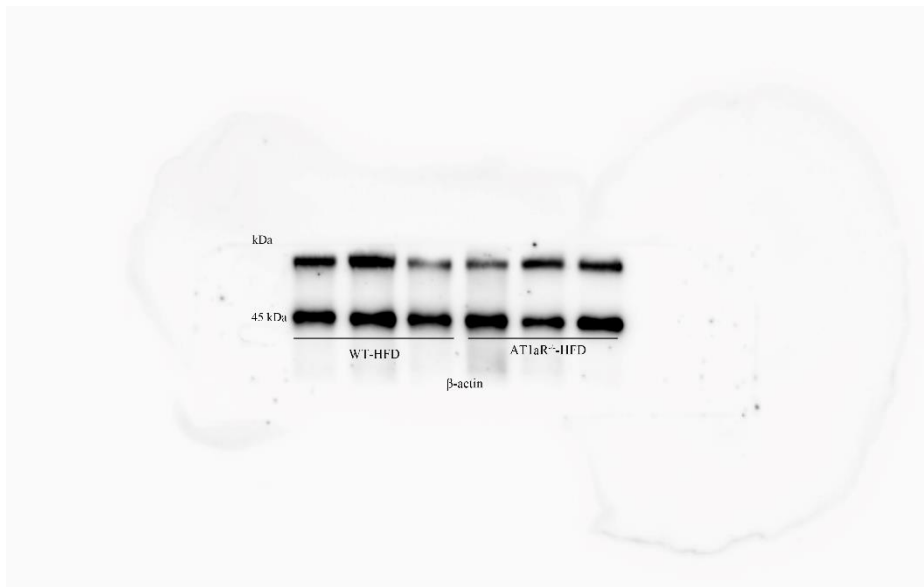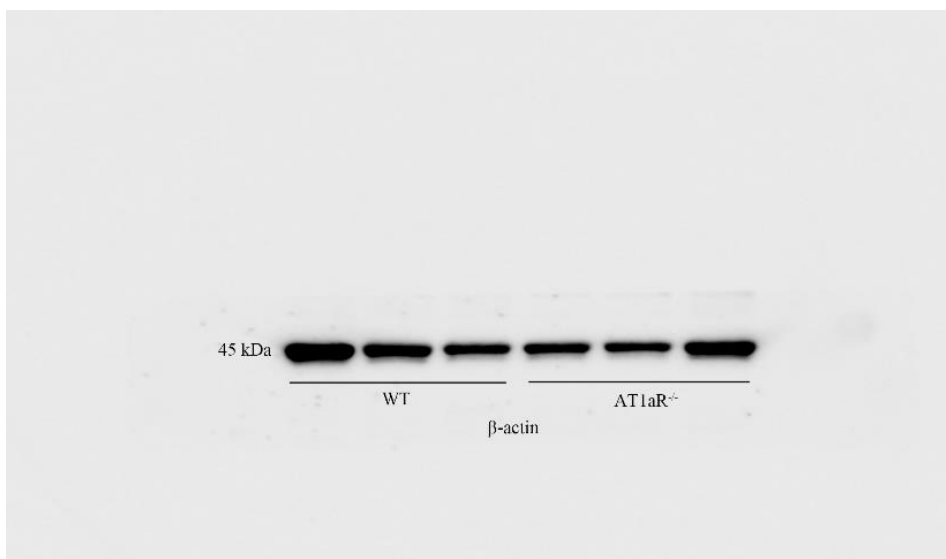

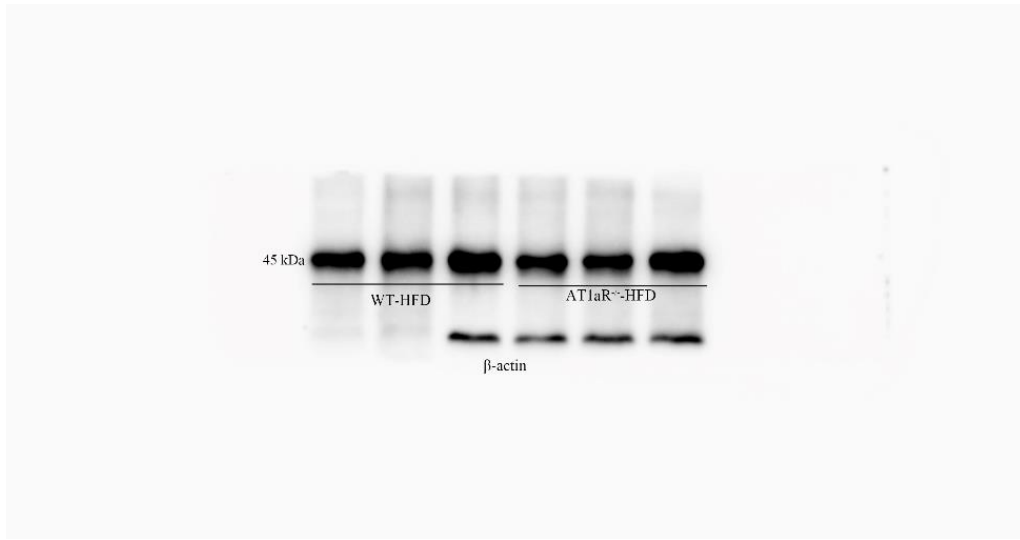

Raw images in Extended Fig 3

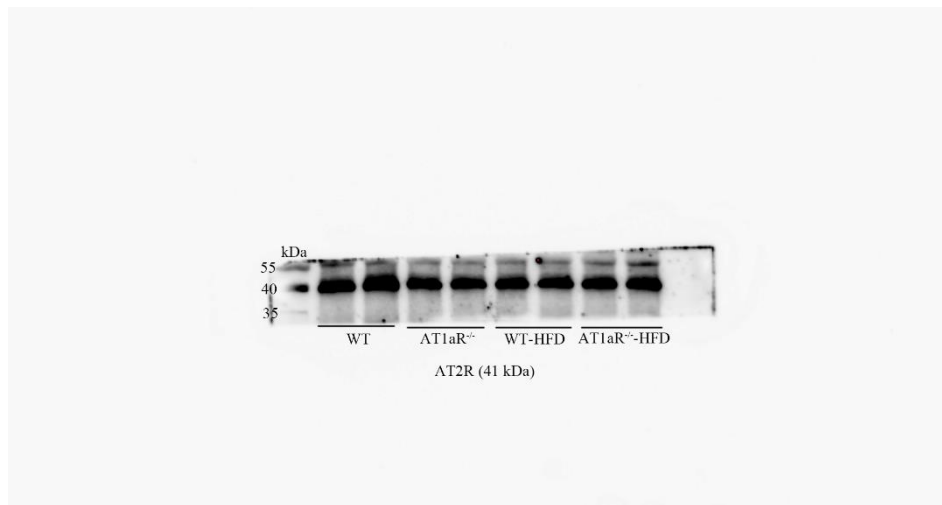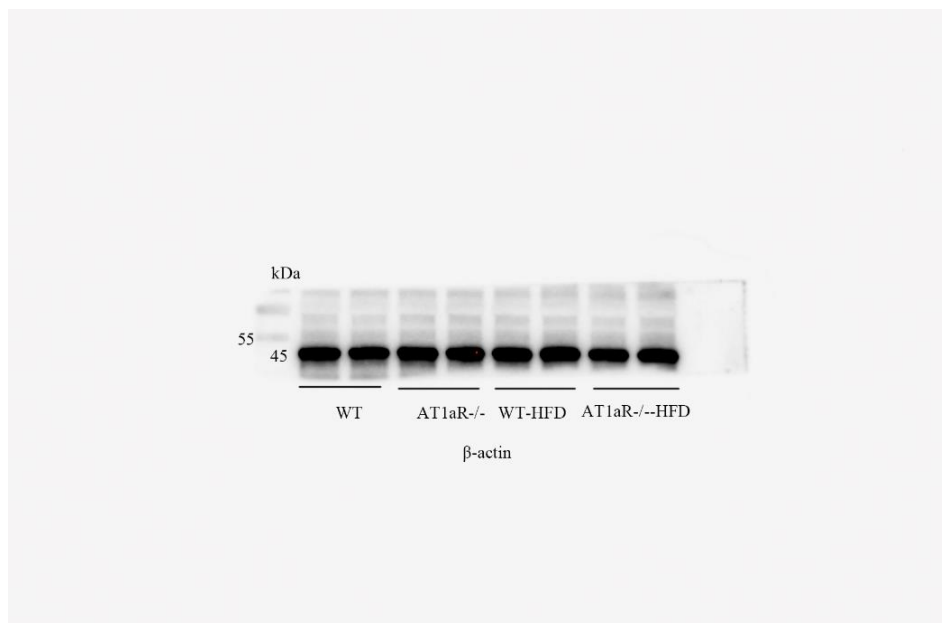

Supplement: pone.0267331.s004.pdf [file pone.0267331.s004.pdf]
